# Supplementary material
Source: Springer Nature journal article supplement (https://www.springermedizin.de/resource/supplementary/12933_2007_103_MOESM2_ESM.doc/9539596)
Supplement: MOESM2 [file 9539596]

# Table. 2 Clinical Characteristics of DM Patients in Al Ain District, UAE

| **Variable name** | Prevalence of DM | |
| --- | --- | --- |
|  | n | Percent **(95% CI)** |
| **Type of DM** |  |  |
| Type 1 | 68 | 13.6 (10.6-16.6) |
| Type 2 | 431 | 86.4 (83.4-89.4) |
| **Mode of Diagnosis** |  |  |
| Incidental | 245 | 48.5 (44.1-52.9) |
| Screening | 39 | 7.7 (5.4-10.0) |
| Symptomatic | 221 | 43.8 (39.5-48.1) |
| **Family History of DM** |  |  |
| Present | 270 | 54.3 (49.9-58.7) |
| Absent | 227 | 45.7(41.3-50.1) |
| **Duration of the DM** |  |  |
| < 1 year | 33 | 6.6 (4.4-8.8) |
| 1-5 years | 199 | 40.0 (35.7-44.3) |
| 6-10 years | 161 | 32.3 (28.2-36.4) |
| 11-20 years | 98 | 19.7 (16.2-23.4) |
| >21 years | 7 | 1.4 (0.4-2.4) |
| **Hypertension** |  |  |
| Present | 178 | 34.9 (30.0-38.8) |
| Absent | 332 | 65.1(61.0-69.2) |
| **Dyslipidaemia** |  |  |
| High total cholesterol level | 152 | 34.4 (30.0-38.8) |
| Within the range | 290 | 65.5(61.1-69.9) |
| **Triglycerides** |  |  |
| Elevated triglycerides | 105 | 23.9 (19.9-27.9) |
| Within reference range | 334 | 76.1(72.1-80.1) |
| Microalbuminuria |  |  |
| Negative | 175 | 38.8(34.3-43.3) |
| Positive | 276 | 61.2(56.7-65.7) |
| HAB1C |  |  |
| Good control | 150 | 37.6(32.8-42.4) |
| Poor control | 249 | 62.4(57.6-67.2) |
| **Coronary Artery Disease** |  |  |
| Present | 73 | 14.4(11.3-17.5) |
| Absent | 434 | 85.6(82.5-88.7) |
| **Cerebrovascular Disease** |  |  |
| Present | 18 | 3.5(1.9-5.1) |
| Absent | 490 | 96.5(94.9-98.1) |
| **Peripheral Vascular Disease**  Present  Absent | 59  451 | 11.6(8.8-14.4)  88.5(85.6-91.2) |
